# Supplementary material for: A Digital PCR Method Based on Highly Specific Taq for Detecting Gene Editing and Mutations
Source: MDPI journal article supplement (doi:10.3390/ijms241713405), 2023-08-29
Supplement: s1 [file s1]

# Supplementary Table S1. Oligos for dPCR assay.

## A. Oligos for GEF-dPCR analysis

|                        | sequence (5' – 3')                |
|------------------------|-----------------------------------|
| Primer 1               | CAGCTCCCGTGCCTTATGGTTAC           |
| Primer 2               | CTCCGCGGGGTACGCGGCCA              |
| NHEJ-sensitive probe   | HEX-TGGAGGCGGGTACTACTCCTGCCG-BHQ1 |
| NHEJ-insensitive probe | FAM-ccctgtgccaggcagccacc-BHQ1     |

## B. Oligos for get-dPCR analysis in indel-frequency quantification

| indel-sensitive amplicon            | sequence (5' – 3')            |
|-------------------------------------|-------------------------------|
| Primer 1 ( <i>watching primer</i> ) | GTGCCTTATGGTTACTTTGGAGGC      |
| Primer 2                            | CTCCGCGGGGTACGCGGCCA          |
| Probe                               | FAM-ccctgtgccaggcagccacc-BHQ1 |

| indel-insensitive amplicon | sequence (5' – 3')              |
|----------------------------|---------------------------------|
| Primer 1                   | GTTTCATCACCAAGGACAAGAGGCG       |
| Primer 2                   | TGTTCTTCACCTTGGCGAGAACCT        |
| Probe                      | HEX-CTCGGCAGCCACCAGCCTCTCG-BHQ1 |

## C. Oligos for get-dPCR analysis in site-mutation detection

| KRAS c.35G>T mutation-sensitive amplicon | sequence (5' – 3')                |
|------------------------------------------|-----------------------------------|
| Primer 1 ( <i>watching primer</i> )      | AAGGCACTCTTGCCTACGCCAA            |
| Primer 2                                 | CACATTTTCATTATTTTATTATAAGGCCTGCTG |
| Probe                                    | CY5-AGCTCCAACCTACCACAAGTT-MGB     |

| BRAF c.1799T > A mutation-sensitive amplicon | sequence (5' – 3')            |
|----------------------------------------------|-------------------------------|
| Primer 1 ( <i>watching primer</i> )          | AAATAGGTGATTTTGGTCTAGCTACAGA  |
| Primer 2                                     | CCATCCACAAAATGGATCCAGACAACCTG |
| Probe                                        | FAM-TCTCGATGGAGTGGGTCCC-MGB   |

| BRAF c.1391G>T mutation-sensitive amplicon | sequence (5' – 3')           |
|--------------------------------------------|------------------------------|
| Primer 1 ( <i>watching primer</i> )        | TTGTAGACTGTTCCAAATGATCCAGATA |
| Primer 2                                   | CGGGACTCGAGTGATGATTGGGAGA    |
| Probe                                      | ROX-TGTCCCCTGTAATCTGCCC-MGB  |

| mutation-insensitive amplicon | sequence (5' – 3')             |
|-------------------------------|--------------------------------|
| Primer 1                      | GCTCGGCCAGTACTCCCGGC           |
| Primer 2                      | CCGCCGCCTTCAGTGCCTGC           |
| Probe                         | HEX-CGCCATTTCGGACTGGGAG-3' MGB |

**Supplementary Table S2.** Mutation information of cancer cell lines

| Cell line  | Gene | Protein Change | Chromosome | HGVSc <sup>*</sup>          | Mutation Type     | Allele Frequency | Variant Reads | Ref Reads |
|------------|------|----------------|------------|-----------------------------|-------------------|------------------|---------------|-----------|
| SW620      | KRAS | G12V           | 12         | ENST00000311936.3:c.35G>T   | Missense_Mutation | 1                | 291           | 0         |
| HT-29      | BRAF | V600E          | 7          | ENST00000288602.6:c.1799T>A | Missense_Mutation | 0.244763         | 222           | 685       |
| MDA-MB-231 | BRAF | G464V          | 7          | ENST00000288602.6:c.1391G>T | Missense_Mutation | 0.586667         | 88            | 62        |

\* Human Genome Variation Society (HGVSc)

Information obtained from the cBioPortal Database
