# Supplementary material for: A Digital PCR Method Based on Highly Specific Taq for Detecting Gene Editing and Mutations
Source: MDPI journal article supplement (doi:10.3390/ijms241713405), 2023-08-29
Supplement: s1 [file s1]

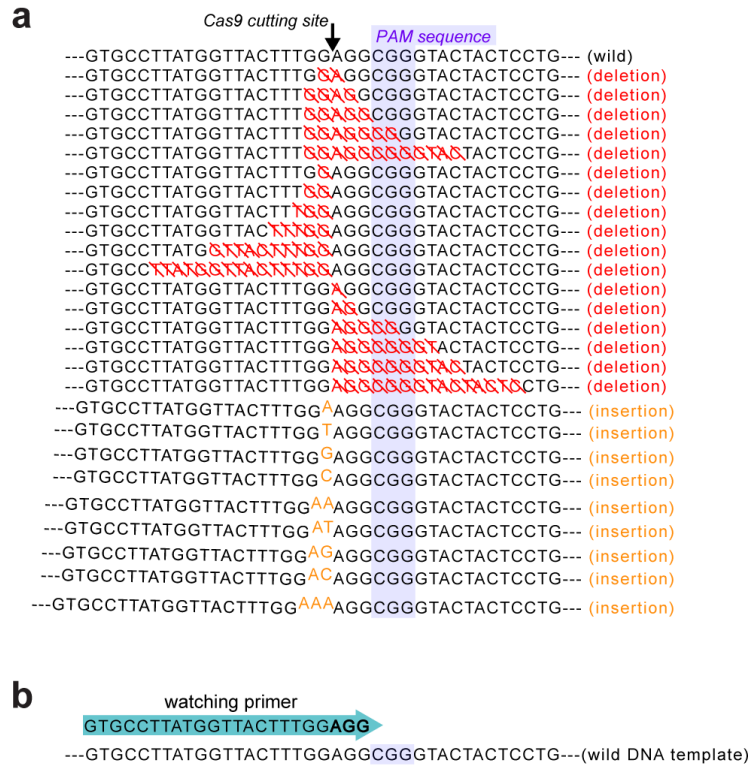

**Supplementary Figure S1.** Schematic illustration of indel sequence and primer design. **(a)** PAM sequence location and individual sequence of 26 indel gene variations on HOXB13 gene coding sequence. **(b)** the sequence and location of the indel-sensitive primer, containing three watching bases “AGG”.
